## CASE REPORTS

9. Greig JD, Garden OJ, Carter DC: Prophylactic treatment of patients with esophageal varices: Is it ever indicated? *World J Surg* 1994; 18:176-84
10. Kleber G, Sauerbruch T, Ansari H, Paumgartner G: Prediction of variceal hemorrhage in cirrhosis: A prospective follow-up study. *Gastroenterology* 1991; 100:1332-7
11. Grace ND: The side-to-side portocaval shunt revisited. *N Engl J Med* 1994; 330:208-9
12. Korula J, Balart LA, Radvan G, Zweiban BE, Larson AW, Kao HW, Yamada S: A prospective, randomized controlled trial of chronic esophageal variceal sclerotherapy. *Hepatology* 1985; 5:584-9
13. Westaby D, MacDougall BRD, Williams R: Improved survival following injection sclerotherapy for esophageal varices: Final analysis of a controlled trial. *Hepatology* 1985; 5:827-30
14. Burroughs AK, Hamilton G, Phillips A, Mezzanotte G, McIntyre N, Hobbs KEF: A comparison of sclerotherapy with staple transection of the esophagus for the emergency control of bleeding from esophageal varices. *N Engl J Med* 1989; 321:857-62
15. Westaby D, Hayes PC, Gimson AES, Polson RJ, Williams R: Controlled clinical trial of injection sclerotherapy for active variceal bleeding. *Hepatology* 1989; 9:274-7
16. Rikkers LF, Burnett DA, Volentine GD, Buchi KN, Cormier RA: Shunt surgery *versus* endoscopic sclerotherapy for long-term treatment of variceal bleeding. *Ann Surg* 1987; 206:261-71
17. Henderson JM, Kutner MH, Millikan WJ Jr, Galambos JT, Riepe SP, Brooks WS, Bryan C, Warren WD: Endoscopic variceal sclerosis compared with distal splenorenal shunt to prevent recurrent variceal bleeding in cirrhosis. *Ann Int Med* 1990; 112:262-9

Anesthesiology

1996; 84:233-5

© 1996 American Society of Anesthesiologists, Inc.

Lippincott-Raven Publishers

## Anaphylactoid Reaction to Protamine Confirmed by Plasma Tryptase in a Diabetic Patient during Open Heart Surgery

Makoto Takenoshita, M.D.,\* Masahiro Sugiyama, M.D.,† Yasutsugu Okuno, M.D.,† Yoshimi Inagaki, M.D.,‡ Ikuto Yoshiya, M.D.,§ Yasuhisa Shimazaki, M.D.¶

ANAPHYLACTOID reactions to protamine during open heart surgery in diabetic patients who use insulin preoperatively have been reported.<sup>1</sup> We describe a similar case in which the anaphylactoid reaction to protamine was confirmed by increased plasma tryptase concentration and a positive skin test.

### Case Report

A 53-yr-old, 171-cm, 52-kg man was scheduled for a patch closure of an atrial septal defect. No transfusion was expected. Preoperative

hemodynamics included; blood pressure 110/70 mmHg, heart rate 64 beats/min, cardiac index  $2.4 \text{ l} \cdot \text{min}^{-1} \cdot \text{m}^{-2}$ , Qp/Qs 2.8, and ejection fraction 47%. Medical history included diabetes mellitus treated with diet control and oral hypoglycemics until 6 months earlier, when NPH insulin had been added. He claimed no allergy to food or drugs.

Anesthesia was induced with diazepam and fentanyl and maintained with 33% N<sub>2</sub>O, fentanyl, and pancuronium bromide before cardiopulmonary bypass. Duration of cardiopulmonary bypass was 55 min, and no blood was transfused. About 15 min after cardiopulmonary bypass, an injection of protamine (protamine sulfate, 10 mg/ml, Shimizu) was started *via* the peripheral vein. Within about 10 min, when 12.5 ml protamine had been injected, the systolic blood pressure decreased from approximately 100 to 40 mmHg. The heart rate increased from 105 to 135 beats/min. Initially, hypovolemia was assumed to be the cause of the hypotension and the remaining fluid in the oxygenator and plasma protein fraction (PPF) was infused rapidly. Within 10 min, systolic blood pressure recovered gradually but remained at 70-80 mmHg, and dopamine ( $3 \mu\text{g} \cdot \text{kg}^{-1} \cdot \text{min}^{-1}$ ) was given. Edema on the face, ears, lips, and conjunctiva were noticed. The end-tidal carbon dioxide, sampled from the distal end of the endotracheal tube, decreased from 30-35 to 15-20 mmHg. Peak inspiratory pressure increased, and decreased deflation of the lungs was observed. Within 10 min after administering protamine, SpO<sub>2</sub> gradually decreased from 100% to 84% and recovered to 100% about 40 min after protamine. Arterial blood gas analyses (table 1) demonstrated hypoxia, hypercarbia, and hemoconcentration. Although

\* Assistant Professor, Department of Anesthesiology.

† Resident, Department of Anesthesiology.

‡ Instructor, Department of Anesthesiology.

§ Professor and Chairman, Department of Anesthesiology.

¶ Associate Professor, First Department of Surgery.

Received from the Department of Anesthesiology, Osaka University Medical School, Osaka, Japan. Submitted for publication May 25, 1995. Accepted for publication September 7, 1995.

Key words: Allergy, anaphylactoid reaction: tryptase. Diabetes mellitus: insulin. Surgery, cardiac: protamine.



## CASE REPORTS

**Table 1. Arterial Blood Gas Analyses during the Anaphylactoid Reaction**

| Time                       | FiO <sub>2</sub> | pH   | P <sub>O<sub>2</sub></sub><br>(mmHg) | P <sub>CO<sub>2</sub></sub><br>(mmHg) | BE<br>(mEq/L) | Hb<br>(g/dl) |
|----------------------------|------------------|------|--------------------------------------|---------------------------------------|---------------|--------------|
| 5 min before protamine     | 1.0              | 7.44 | 296                                  | 38                                    | 2.2           | 8.7          |
| 20 min after protamine     | 1.0              | 7.20 | 59                                   | 68                                    | -3.7          | 13.4         |
| 45 min after protamine     | 1.0              | 7.18 | 197                                  | 67                                    | -1.9          | 13.0         |
| 58 min after protamine     | 1.0              | 7.22 | 278                                  | 63                                    | -0.6          | 12.8         |
| 1 h 30 min after protamine | 0.6              | 7.31 | 215                                  | 51                                    | 0.6           | 12.8         |
| 2 h 18 min after protamine | 0.6              | 7.33 | 130                                  | 48                                    | 0.3           | 12.2         |

FiO<sub>2</sub> = fractional inspired oxygen tension; P<sub>O<sub>2</sub></sub> = arterial oxygen tension; P<sub>CO<sub>2</sub></sub> = arterial carbon dioxide tension; BE = base excess; Hb = hemoglobin.

2,000 ml of PPF was rapidly infused within 1 h after protamine, central venous pressure remained 1–3 mmHg, and the right atrium and ventricle remained small, as observed in the operating field. Based on these observations, an anaphylactoid reaction was suspected. Methylprednisolone (1,000 mg) was injected. The blood was sampled about 1 h after the protamine injection and centrifuged, and the serum was frozen for tryptase measurement. Systolic blood pressure increased to greater than 100 mmHg with dopamine. Fluid balance during anesthesia (including cardiopulmonary bypass) was as follows: blood loss 460 g, PPF 3,250 ml, lactated Ringer's solution 5,040 ml, and urine 970 ml. The trachea was extubated the following morning.

Serum tryptase was 26.1 ng/ml (normal value < 2.0 ng/ml, RIA method, Mitsubishi Yuka BCL, Osaka, Japan). The skin test for protamine was performed twice, 53 and 518 days after the operation. In the first test, protamine sulfate (10 mg/ml) was diluted 50 times with saline, and 0.1 ml (0.02 mg) was injected intradermally, resulting in a wheal (W, 6 × 11 mm) and a flare (F, 25 × 30 mm) in 20 min. Saline was used as a negative control, and there was no flare. In the second test, 0.02 ml of each material was injected intradermally, and the diameters of W and F were measured 15 min after the injection. Each drug was diluted with saline. Protamine was positive: 0.01 mg/ml protamine sulfate (W 4 × 5 mm, F 20 × 22 mm) and 0.1 mg/ml protamine sulfate (W 6 × 7 mm, F 22 × 32 mm). Heparin was negative: 1,000 U/ml heparin sodium (W 0 × 0 mm, F 0 × 0 mm). Saline was used as a negative control (W 0 × 0 mm, F 0 × 0 mm). Tubocurarine and histamine were used as positive controls: 0.003 mg/ml tubocurarine chloride (W 0 × 0 mm, F 3 × 4 mm), 0.03 mg/ml tubocurarine chloride (W 5 × 9 mm, F 25 × 28 mm), and 0.01 mg/ml histamine dihydrochloride (W 7 × 10 mm, F 25 × 50 mm).

## Discussion

Catastrophic reactions to protamine during cardiovascular surgery are reported to be rare (0.13%).<sup>2</sup> However, in patients with diabetes using NPH insulin, which contains protamine, the incidence is 50 times greater compared to the nondiabetic population.<sup>1</sup> In the current case, the patient had been treated with NPH

insulin (14–20 U/day) for 5 months and appeared to have developed allergy to protamine before the cardiac surgery. His sensitivity to protamine was confirmed by the skin test performed 53 and 518 days after the operation. PPF has been reported to cause similar reactions,<sup>3</sup> but in this case, PPF was started after the onset of hypotension. However, it is possible that PPF could have influenced the adverse hemodynamic effects.

Serum tryptase is an important indicator of mast cell involvement<sup>4</sup> and anaphylactoid reactions.<sup>5</sup> The increased serum tryptase concentration observed 1 h after the protamine injection in the current case, with the hypotension, hypovolemia, persistent hemoconcentration, edema, hypoxia, and hypercarbia, suggested that an anaphylactoid reaction had occurred.

Plasma histamine concentration is another indicator of anaphylactoid reactions, but tryptase measurement has some advantages over histamine measurement.<sup>5</sup> First, because of the short half-life of histamine in the circulation after release from mast cells (half-life is several minutes), the blood must be sampled within 30 min. Tryptase (half-life is about 2 h) can be sampled 1 h after the life-threatening events. Second, because of the presence of histamine in basophils, hemolyzed or clotted blood cannot be used for histamine measurement but can be used for tryptase measurement. Third, the blood sample should be centrifuged at low temperature immediately, and the plasma should be frozen for histamine measurement, but the sample can be left at room temperature up to several days for tryptase measurement.<sup>4</sup>

In summary, we report an anaphylactoid reaction to protamine, confirmed by increased plasma tryptase concentration and a positive skin test, during open heart surgery in a patient with diabetes treated preoperatively with NPH insulin.



## CASE REPORTS

## References

1. Levy JH, Zaidan JR, Faraj B: Prospective evaluation of risk of protamine reactions in patients with NPH insulin-dependent diabetes. *Anesth Analg* 1986; 65:739-42
2. Stewart WJ, McSweeney SM, Kellett MA, Faxon DP, Ryan TJ: Increased risk of severe protamine reactions in NPH insulin-dependent diabetics undergoing cardiac catheterization. *Circulation* 1984; 70:788-92
3. Stoelting RK: Allergic reactions during anesthesia. *Anesth Analg* 1983; 62:341-56
4. Schwartz LB, Yunginger JW, Miller J, Bokhari R, Dull D: Time course of appearance and disappearance of human mast cell tryptase in the circulation after anaphylaxis. *J Clin Invest* 1989; 83:1551-55
5. Laroche D, Vergnaud MC, Sillard B, Soufarapis H, Bricard H: Biochemical markers of anaphylactoid reactions to drugs. *ANESTHESIOLOGY* 1991; 75:945-9
